# Supplementary material for: RNA-mediated demixing transition of low-density condensates
Source: PubMed Central journal article supplement (PMC10140143; doi:10.1038/s41467-023-38118-z), 2023-04-27
Supplement: 41467_2023_38118_MOESM2_ESM.pdf [file 41467_2023_38118_MOESM2_ESM.pdf]

**File name: Supplementary Movie 1**

**Description:** Time-lapse video of U2OS cells expressing EGFP-SRSF2. Cells were imaged with HT-2H. All refractive index images are adjusted to 1.337-1.37.

**File name: Supplementary Movie 2**

**Description:** Time-lapse video of U2OS cells expressing G3BP1-EGFP treated with 500  $\mu$ M sodium arsenite. Cells were imaged with HT-2H. All refractive index images are adjusted to 1.337-1.37.
